# Supplementary material
Source: MDPI journal article supplement (https://www.mdpi.com/2813-0227/4/1/8)
Supplement: s1 [file s1]

## Occurrence of Picobirnavirus in Domestic and Wild Animals from Three Cities of Brazilian Amazon

**Table S2**

**Table 1.** Data referring to statistical analysis of the frequency of PBV in fecal samples of animals, according to the group, gender, and city of origin, in the period from October-2014 to April-2016

| CATEGORIES    | PICOBIRNAVIRUS |      |          |       | Total |       | p                  |
|---------------|----------------|------|----------|-------|-------|-------|--------------------|
|               | Positive       |      | Negative |       | n     | %     |                    |
|               | n              | %    | n        | %     |       |       |                    |
| GROUP         |                |      |          |       |       |       | 0.000 <sup>#</sup> |
| Avian         | 2              | 4.9  | 39       | 95.1  | 41    | 100.0 |                    |
| Bovine        | 3              | 13.0 | 20       | 87.0  | 23    | 100.0 |                    |
| Canine        | 5              | 14.7 | 29       | 85.3  | 34    | 100.0 |                    |
| Equine        | 3              | 7.3  | 38       | 92.7  | 41    | 100.0 |                    |
| Feline*       | 9              | 27.3 | 24       | 72.7  | 33    | 100.0 |                    |
| Marsupial*    | 1              | 4.0  | 24       | 96    | 25    | 100.0 |                    |
| Bats          | 0              | 0.0  | 30       | 100.0 | 30    | 100.0 |                    |
| Rodent*       | 0              | 0.0  | 8        | 100.0 | 8     | 100.0 |                    |
| Swine*        | 9              | 39.1 | 14       | 60.9  | 23    | 100.0 |                    |
| GENDER        |                |      |          |       |       |       | 0.918 <sup>¥</sup> |
| Female        | 14             | 14.0 | 86       | 86.0  | 100   | 100.0 |                    |
| Male          | 15             | 13,5 | 96       | 86,5  | 111   | 100,0 |                    |
| CITY          |                |      |          |       |       |       | 0,004 <sup>¥</sup> |
| Peixe-Boi*    | 8              | 27,6 | 21       | 72,4  | 29    | 100,0 |                    |
| Santa Bárbara | 10             | 19,6 | 41       | 80,4  | 51    | 100,0 |                    |
| Viseu*        | 14             | 7,9  | 164      | 92,1  | 178   | 100,0 |                    |
| Total         | 32             | 12,4 | 226      | 87,6  | 258   | 100,0 |                    |

p: Probability score of the applied statistic test. <sup>#</sup>G Test. <sup>¥</sup>Chi-square Test. \*Categories that contribute to statistical significance. The p-value was 0.000954.
